# Supplementary material for: Ultrahigh-sensitivity organic photodetectors processed with a non-halogenated solvent for a self-powered mechano-optoelectronic coupled sensing system
Source: Royal Society of Chemistry journal article supplement (doi:10.1039/d5mh02214b), 2026-01-01
Supplement: d5mh02214b1.pdf [file d5mh02214b1.pdf]

Supplementary Information

**Ultrahigh-Sensitivity Organic Photodetectors Processed with Non-Halogenated Solvent for Self-Powered Mechano-Optoelectronic Coupled Sensing System**

Baofa Lan<sup>[a]#</sup>, Xianfeng Jin<sup>[b][c]#</sup>, Zhenhua yang<sup>[d]</sup>, Jia Wang<sup>[a]</sup>, Wenying Zhou<sup>[a]</sup>,  
Yingshi Guan<sup>[e]</sup>, Jian Zhu<sup>[d]</sup>, Zhaofeng Wang<sup>[b][c]\*</sup>, Bin Kan<sup>[a]\*</sup>

[a] School of Materials Science and Engineering, National Institute for Advanced Materials, Nankai University, Tianjin 300350, China.

[b] Shandong Laboratory of Advanced Materials and Green Manufacturing at Yantai, Yantai, Shandong 264006, China.

[c] State Key Laboratory of Solid Lubrication, Lanzhou Institute of Chemical Physics, Chinese Academy of Sciences, Lanzhou, Gansu 730000, China.

[d] School of Materials Science and Engineering, National Institute for Advanced Materials, Smart Sensing interdisciplinary Science Center, Nankai University, Tianjin 300350, China.

[e] Institute of Advanced Materials and School of Chemistry and Chemical Engineering, Southeast University, Nanjing 211189, China.

<sup>#</sup>These authors contributed equally to this work.

\*Corresponding E-mails: kanbin04@nankai.edu.cn (B. K.); zhfwang@licp.cas.cn (Z. W.)

## **Contents**

### **1. Materials**

### **2. Device Fabrication**

### **3. Measurements and Instruments**

### **4. Supporting Figures and Tables**

## 1. Materials

The Glass/ITO substrate, PEN/ITO substrate, and PEDOT:PSS (Baytron P VP Al 4083) were purchased from Advanced Election Technology Co., Ltd. The PM6 and L8-BO-X were purchased from Jiaxing Hyper Optoelectronics Technology Co., Ltd. The electronic transport material poly[[2,7-bis(2-ethylhexyl)-1,2,3,6,7,8-hexahydro-1,3,6,8-tetraoxobenzo[*lmn*][3,8] phenanthrol-ine-4,9-diyl] -2,5-thiophenedi-yl[9,9-bis[3-(dimethylamino)propyl]-9H-fluorene-2,7-di-yl]-2,5-thiophenediyl (PNDIT-F3N) were purchased from YirouPV Technology Limited. All other reagents and chemicals, including ortho-xylene (*o*-XY), methanol, deionized water, acetone, isopropanol, 1,8-diiodooctane (DIO), and silver (Ag) were directly purchased from commercial sources and used without further purification unless otherwise specified. ML phosphor ZnS:Cu was purchased from Shanghai lvmi Technology Co., Ltd.

## 2. Device Fabrication

### ML device fabrication

The ML layer was fabricated by homogeneously mixing ZnS:Cu powders into the PDMS matrix at a weight ratio of 4:6. The PDMS was composed of base and crosslinker at a weight ratio of 10:1. The composite was placed in a vacuum chamber for 30 mins to remove air bubbles. Subsequently, the ZnS:Cu/PDMS composite was cured at 80°C for 2 h, followed by natural cooling.

### OPD device fabrication

The OPDs were fabricated using a conventional structure comprising ITO/PEDOT:PSS/Active layer/PNDIT-F3N/Ag. Rigid and flexible devices were fabricated on glass and PEN substrates, respectively. For rigid devices, the ITO-coated glass was cleaned with deionized water, acetone, and isopropyl alcohol through ultrasonication for 10 min sequentially. A thin layer of PEDOT:PSS was deposited on the ITO substrate at 4000 rpm for 20 s and then annealed in air at 160°C for 15 min. For flexible devices, the PEN/ITO substrate is wiped with non-woven fabric dipped in isopropyl alcohol. A thin layer of PEDOT:PSS was deposited on the ITO substrate at 4000 rpm for 20 s and then annealed in air at 110°C for 15 min. Following this, the substrates were transferred to a glovebox filled with nitrogen. The active layer solutions

of PM6:L8-BO-X (1:1.2) were prepared by dissolving in *o*-xylene (*o*-XY) at donor concentrations of 10 mg/mL and 0.35 vol% 1,8-diiodooctane (DIO) was employed as a solvent additive. All solutions were stirred at 100°C for 3 h and then spin-coated after cooling to 80°C. The active layer was spun onto the PEDOT:PSS layer at 2000 rpm for 20 s, followed by thermal annealing at 100°C for 5 min. The thickness of active layer was controlled to be ~170 nm. After cooling, a methanol solution of PNDIT-F3N (1 mg/mL) was spin-coated on top of the active layer at 3300 rpm for 20 s. Finally, an Ag electrode with a thickness of 120 nm was evaporated under a vacuum of  $1 \times 10^{-4}$  Pa. The active area of the device is defined by the mask as 0.0324 cm<sup>2</sup>.

### 3. Measurements and Instruments

**ML device characterization.** ML signals were obtained via an optical fiber linked to a collimator (BFC-441; Zolix Instruments Co., Ltd.). Then the obtained signals were transmitted into a CCD camera (iVac-316; Edmund Optics Ltd.), which was attached to a spectrometer (Omni-λ300i; Zolix Instruments Co., Ltd.). The cyclic mechanical deformation of the ML unit is actuated by a custom-fabricated stretch-testing apparatus.

**OPD device characterization.** The current density-voltage (*J-V*) curve of the OPD was recorded in air using a Keithley 4200 source measurement unit and a probe station with a shielded vacuum chamber at room temperature. A QE-R solar cell spectral response measurement system was used to measure the external quantum efficiency (EQE) values of the devices.

**ML-OPD system characterization.** For ML-OPD system characterization, during ML linear motor drive stretching/contraction, the OPD current signal was synchronously recorded via a Keithley 2601B source measurement unit. During the application demonstration phase, during ML mechanical finger drive stretching/contraction, the OPD current signal was synchronously performed on a Keithley 4200 Source Meter Unit (SMU) at room temperature. All photographs and videos were taken with a SAMSUNG S24.

**UV-visible-near infrared (UV-vis-NIR) absorption.** UV-vis-NIR absorption spectra and transmission spectra were recorded on a Cary 5000 UV-vis spectrophotometer. Each film sample was spin-coated on quartz substrate.

**Noise current density spectrum.** Use the Keithley 4200 Source Meter Unit (SMU) to measure the  $I$ - $t$  characteristic curve and directly obtain the noise current density spectrum through the built-in FFT function.

**Cutoff frequency.** Cutoff frequency of the devices was measured with 520 nm laser and modulated by a function generator and digital oscilloscope (Tektronix 4 series B MSO).

**Response time.** Response time of the devices was measured with 520 nm laser and modulated by a function generator and digital oscilloscope (Tektronix 4 series B MSO) with a fixed measurement bandwidth of 20 KHz.

## 4. Supporting Figures and Tables

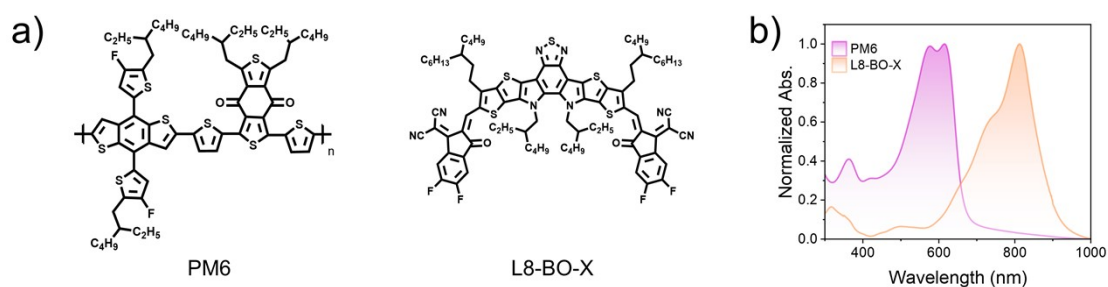

**Figure S1.** (a) Molecular structure of OPD active layer material where PM6 acts as a donor and L8-BO-X acts as an acceptor. (b) Normalized UV-visible-near infrared absorption spectra of PM6 and L8-BO-X.

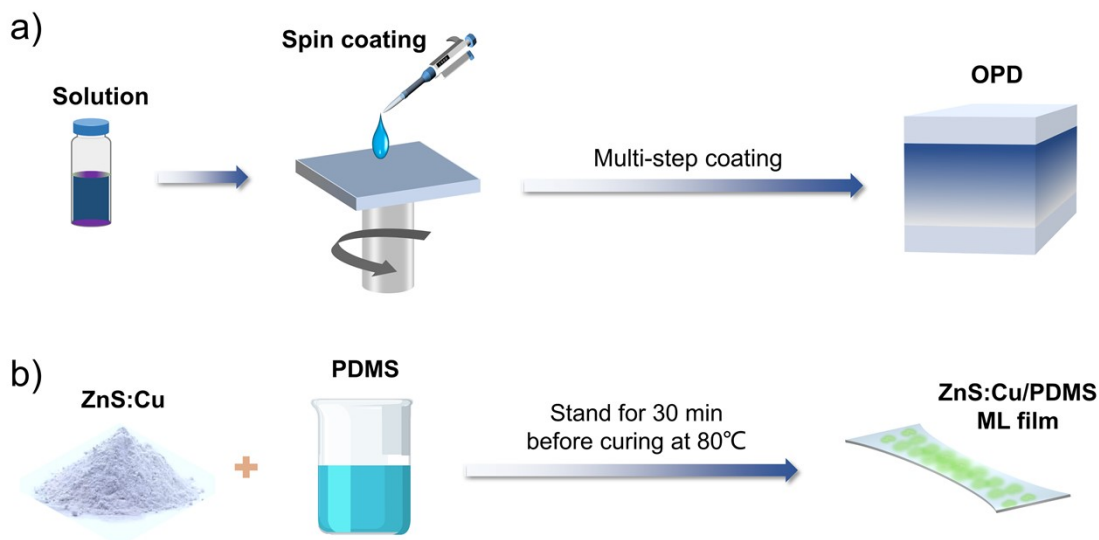

**Figure S2.** Device preparation schematic diagram. (a) OPD preparation process. (b) ML preparation process.

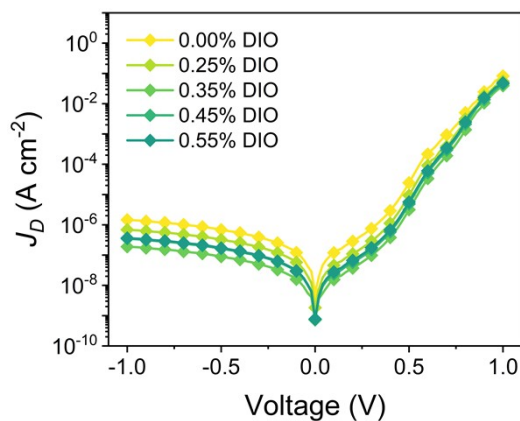

**Figure S3.** Additive (DIO) dosage optimization for rigid OPDs based on PM6:L8-BO-X.

**Table S1.** Additive (DIO) dosage optimization for rigid OPDs based on PM6:L8-BO-X.

| D:A   | Concentration<br>(mg mL <sup>-1</sup> ) | Solvent      | Additive<br>(%) | TA          | Coating speed<br>(rpm s <sup>-1</sup> ) | $J_D$<br>(A cm <sup>-2</sup> ) |
|-------|-----------------------------------------|--------------|-----------------|-------------|-----------------------------------------|--------------------------------|
| 1:1.2 | 22                                      | <i>o</i> -XY | 0.00            | 100°C/5 min | 2500                                    | $5.5 \times 10^{-9}$           |
|       |                                         |              | 0.25            |             |                                         | $1.8 \times 10^{-9}$           |
|       |                                         |              | 0.35            |             |                                         | $7.2 \times 10^{-10}$          |
|       |                                         |              | 0.45            |             |                                         | $7.4 \times 10^{-10}$          |
|       |                                         |              | 0.55            |             |                                         | $7.8 \times 10^{-10}$          |

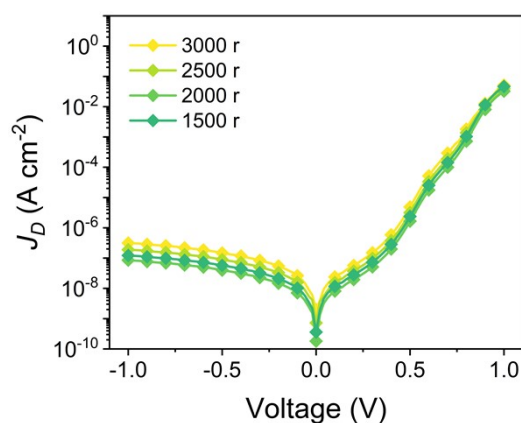**Figure S4.** Optimization of BHJ thickness for rigid OPDs based on PM6:L8-BO-X.**Table S2.** Optimization of BHJ thickness for rigid OPDs based on PM6:L8-BO-X.

| D:A   | Concentration<br>(mg mL <sup>-1</sup> ) | Solvent      | Additive<br>(%) | TA          | Coating speed<br>(rpm s <sup>-1</sup> ) | $J_D$ (A cm <sup>-2</sup> ) |
|-------|-----------------------------------------|--------------|-----------------|-------------|-----------------------------------------|-----------------------------|
| 1:1.2 | 22                                      | <i>o</i> -XY | 0.35            | 100°C/5 min | 3000                                    | $2.0 \times 10^{-9}$        |
|       |                                         |              |                 |             | 2500                                    | $7.2 \times 10^{-10}$       |
|       |                                         |              |                 |             | 2000                                    | $1.8 \times 10^{-10}$       |
|       |                                         |              |                 |             | 1500                                    | $3.6 \times 10^{-10}$       |

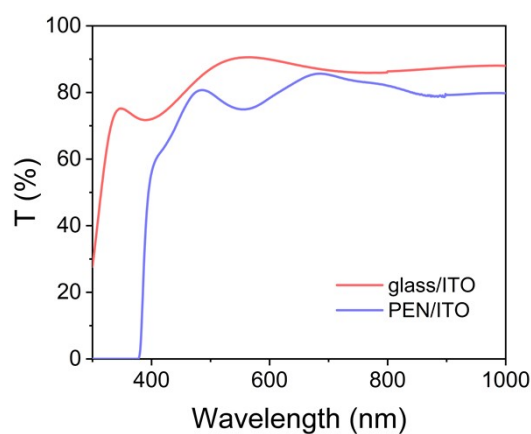

**Figure S5.** Transmission spectra of the glass/ITO and PEN/ITO substrates.

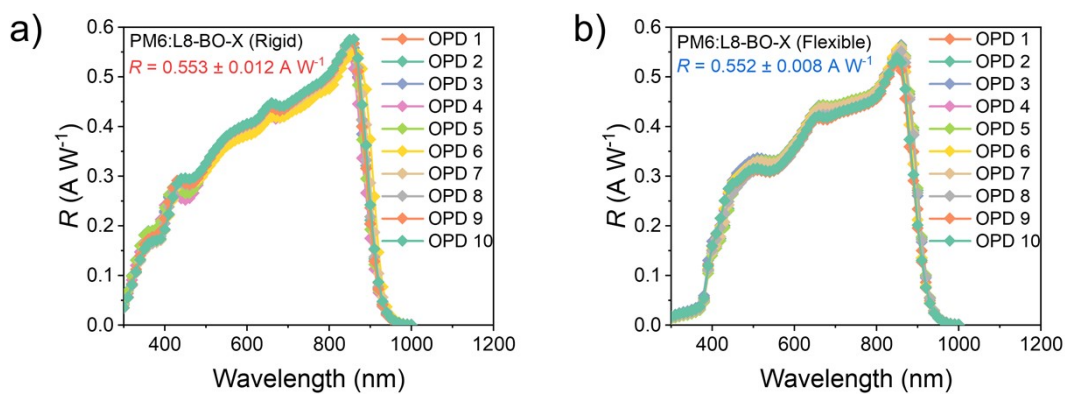

**Figure S6.** The responsivity curves and standard deviations of ten independently prepared rigid and flexible devices.

**Table S3.** Summary of reported OPDs with high responsivity.

| Active layer                    | $R_{max}$<br>(A W <sup>-1</sup> ) | Wavelength<br>(nm) | Ref. |
|---------------------------------|-----------------------------------|--------------------|------|
| PBDT-TT:DPPSe-4Cl:Y6            | 0.18                              | 940                | 1    |
| D18:FM-0F                       | 0.24                              | 812                | 2    |
| PTB7-Th:ISC:PC <sub>61</sub> BM | 0.27                              | 950                | 3    |
| PTB7-Th:ICS                     | 0.27                              | 950                | 3    |
| PM6:CT-Cl                       | 0.33                              | 950                | 4    |
| PBDB-T:TBT-V-F                  | 0.35                              | 800                | 5    |
| D18:FM-8F                       | 0.35                              | 970                | 2    |
| PBDB-T:FM2                      | 0.37                              | 880                | 6    |
| PTB7-Th:PC <sub>70</sub> BM     | 0.37                              | 720                | 7    |



|                                |             |            |                  |
|--------------------------------|-------------|------------|------------------|
| PM6:TPCT-2F                    | 0.39        | 810        | 8                |
| PM7-D5:Y12                     | 0.40        | 800        | 9                |
| PBTTzC3:Y6                     | 0.41        | 830        | 10               |
| PM6:BTP-12-4F                  | 0.42        | 800        | 11               |
| PTB7-Th:A4T-16                 | 0.43        | 750        | 12               |
| PBDB-T:PZF-V:PY-IT             | 0.44        | 850        | 13               |
| PM6:C5QX-B6F                   | 0.45        | 800        | 14               |
| PM6:BTP-eC9                    | 0.46        | 820        | 15               |
| PM6:PY-IT:N2200                | 0.47        | 800        | 16               |
| PCE-10:BTPSV-4F:BTPSV-4Cl      | 0.48        | 870        | 17               |
| PM6:WD6                        | 0.50        | 800        | 18               |
| PM6:Y6                         | 0.51        | 830        | 19               |
| PM6:CH17                       | 0.53        | 830        | 20               |
| <b>PM6:L8-BO-X (Glass/ITO)</b> | <b>0.55</b> | <b>850</b> | <b>this work</b> |
| <b>PM6:L8-BO-X (PEN/ITO)</b>   | <b>0.55</b> | <b>850</b> | <b>this work</b> |

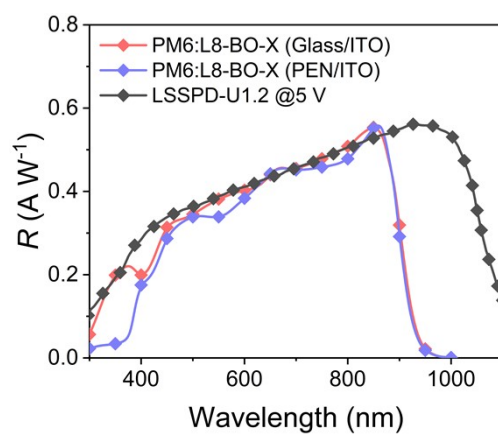

**Figure S7.** Comparison of response spectra between OPD and Si PD, where Si PD was purchased from commercial channels.

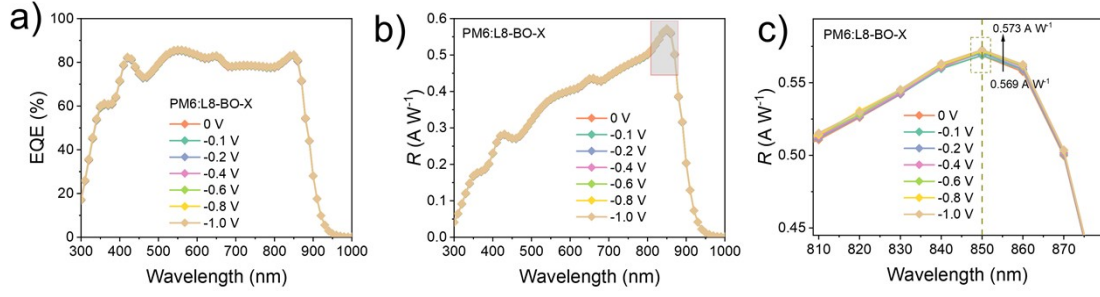

**Figure S8.** Bias-dependent response characteristics for a rigid OPD measured from 0 to -1 V. (a) EQE curves. (b) Responsivity curves. (c) Responsivity curves for localized enlargement.

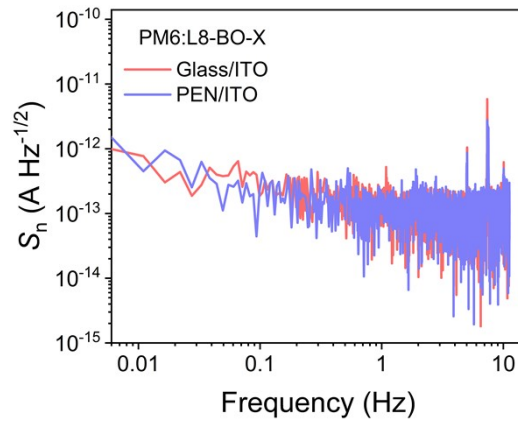

**Figure S9.** Noise spectral density in the dark at zero bias for OPDs.

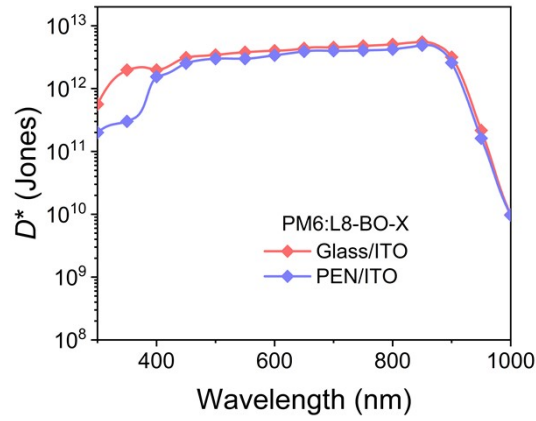

**Figure S10.** Specific detectivities derived from measured noises of OPDs.

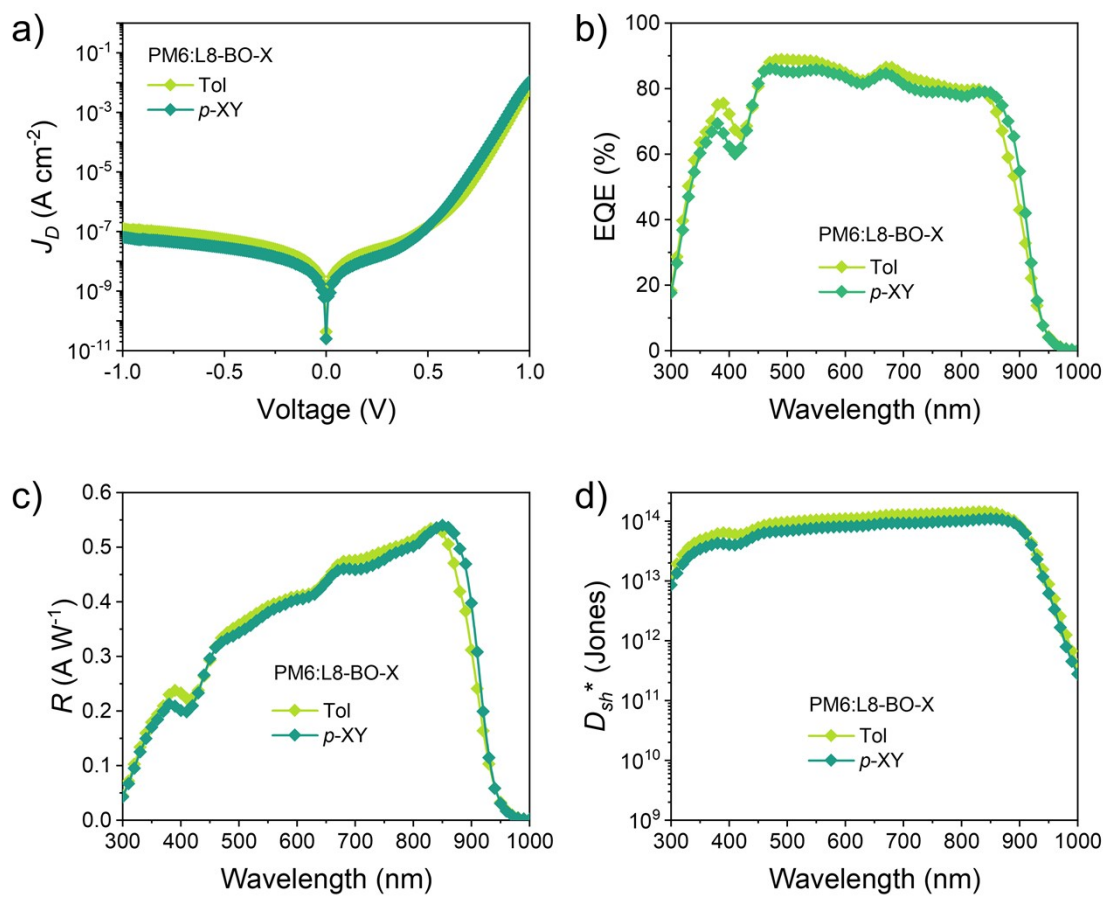

**Figure S11.** Performance of OPDs prepared using toluene and *p*-xylene. (a)  $J$ - $V$  curves measured in the dark. (b) EQE curves. (c) Responsivity curves. (d)  $D_{sh}^*$  curves of devices.

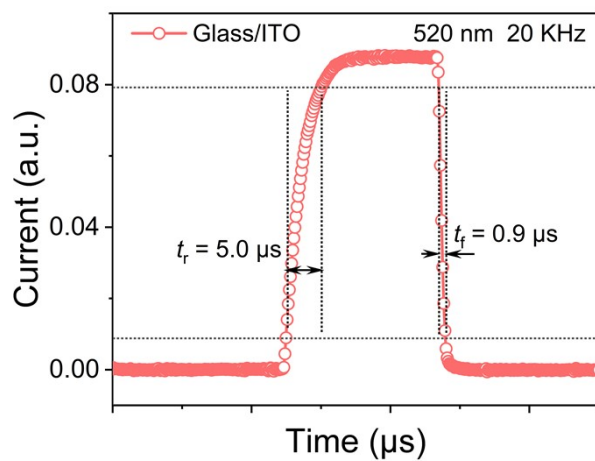

**Figure S12.** Response time of the rigid OPD at zero bias under 520 nm illumination.

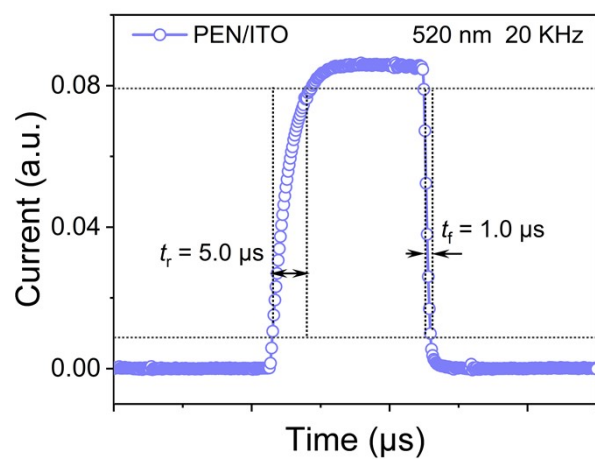

**Figure S13.** Response time of the flexible OPD at zero bias under 520 nm illumination.

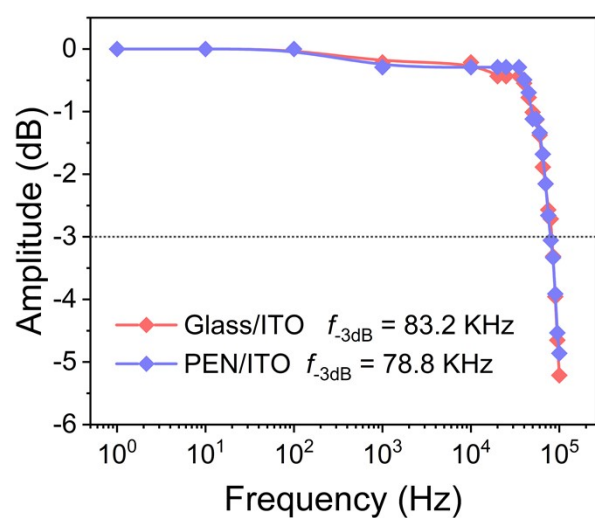

**Figure S14.** The -3 dB cutoff frequency of the OPDs at 520 nm.

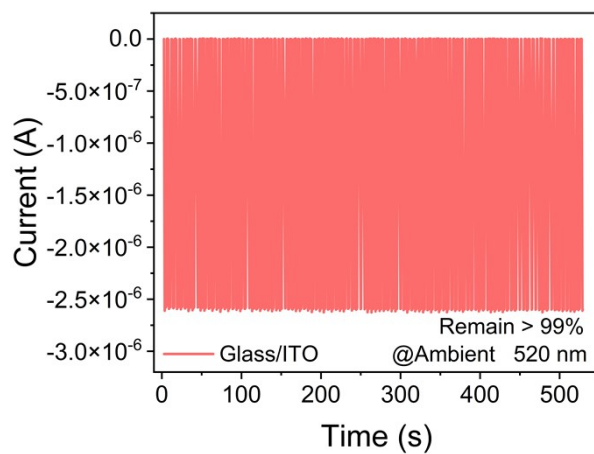

**Figure S15.** Cyclic stability of the rigid OPD device under ambient condition.

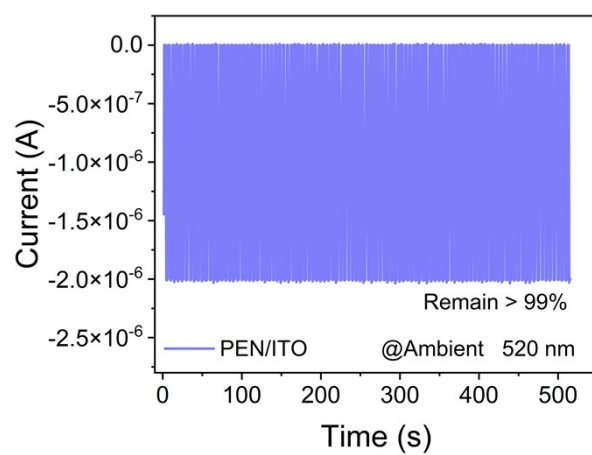

**Figure S16.** Cyclic stability of the flexible OPD device under ambient condition.

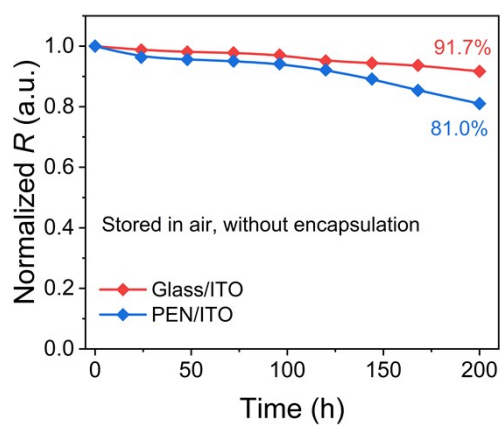

**Figure S17.** Normalized  $R$  as functions of storage time for OPDs exposing in air without encapsulation.

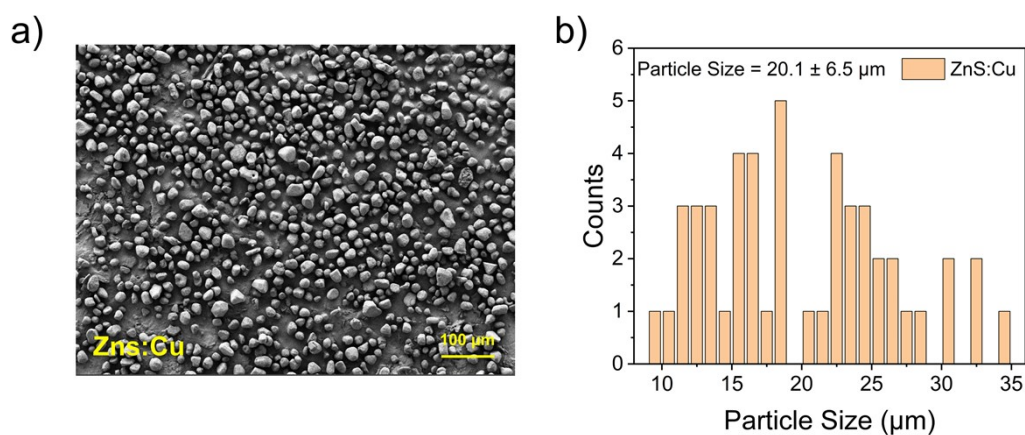

**Figure S18.** (a) SEM image of ZnS:Cu particles. (b) Particle size distribution of ZnS:Cu phosphor.

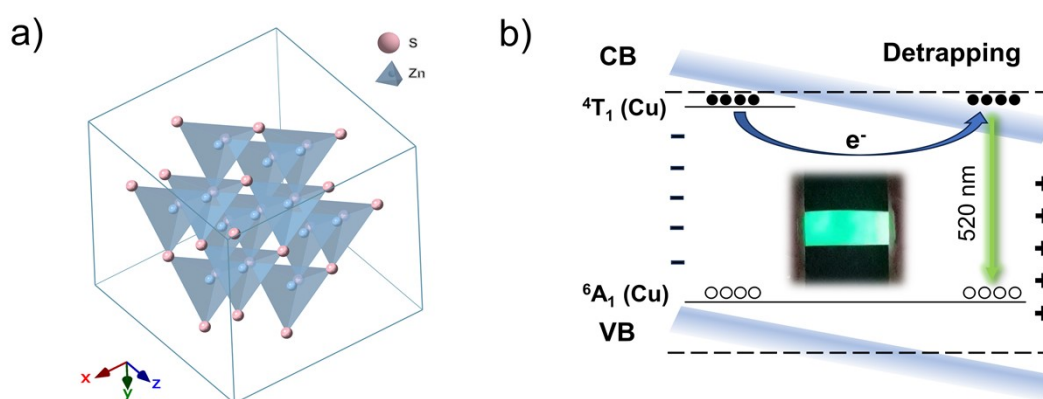

**Figure S19.** (a) The crystal structure of ZnS was drawn using Crystallmaker software. (b) The luminescence mechanism of ZnS:Cu, the inset illustrates a luminescence photograph of ZnS:Cu/PDMS under tensile stress.

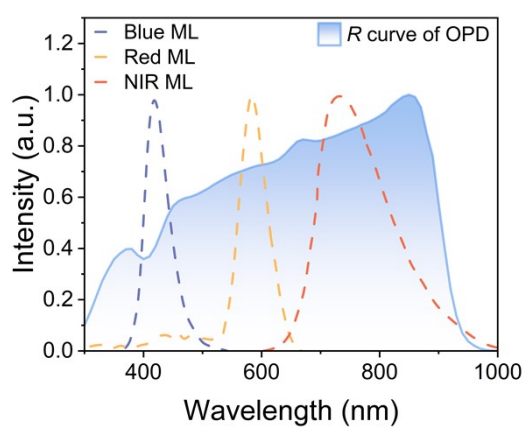

**Figure S20.** The normalized emission spectra of other multi-color MLs and responsivity curve of flexible OPD.

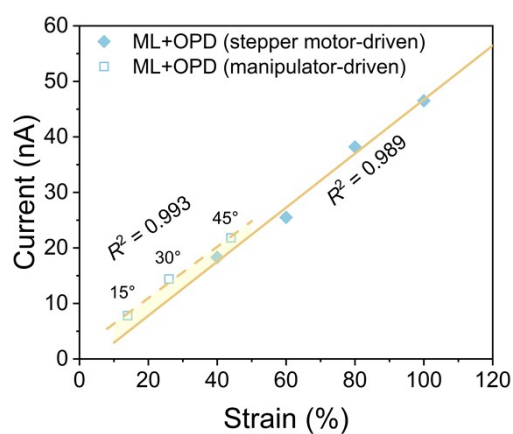

**Figure S21.** Output current fitting and comparison of the ML-OPD system under stepper motor drive (solid line) and manipulator drive (dash line).

**Table S4.** Output current of the ML-OPD system under manipulator drive.

|              | 15° | 30°  | 45°  |
|--------------|-----|------|------|
| Strain (%)   | 14  | 26   | 44   |
| Current (nA) | 7.8 | 14.4 | 21.8 |

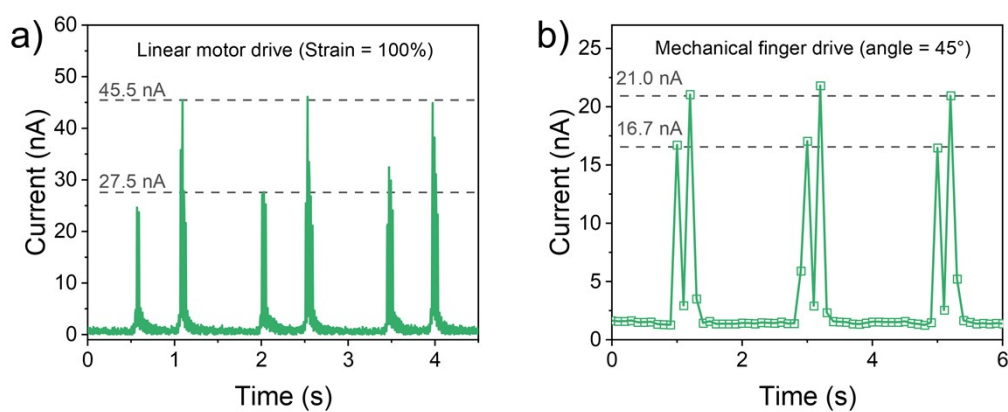

**Figure S22.** The current signal generated by the OPD when the ML is driven by (a) linear motor and (b) manipulator, respectively.

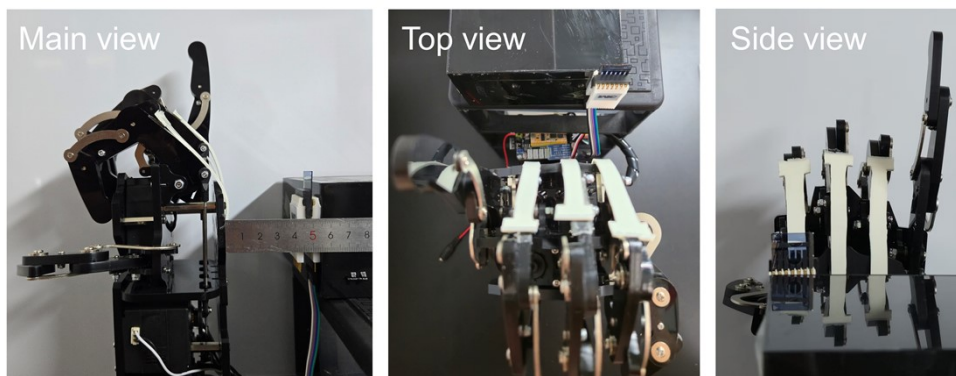

**Figure S23.** Photographs showing the spatial relationship between ML and OPD units in actual application demonstrations.

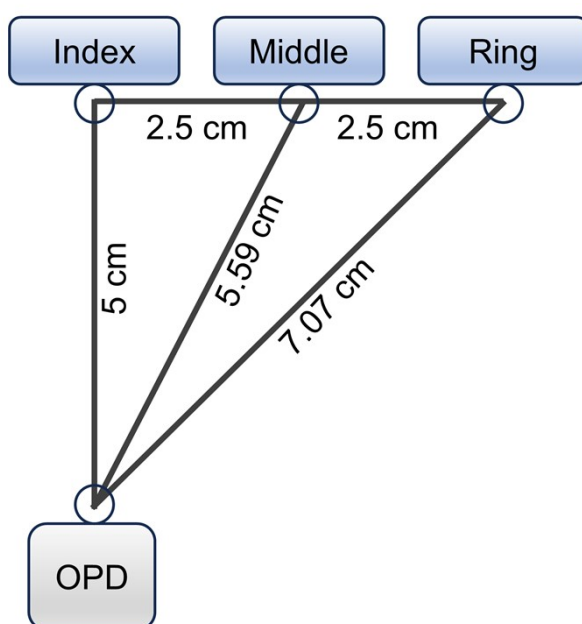

**Figure S24.** Schematic diagram of the spatial relationship between the ML attached to the mechanical finger and OPD units in an actual application demonstration.

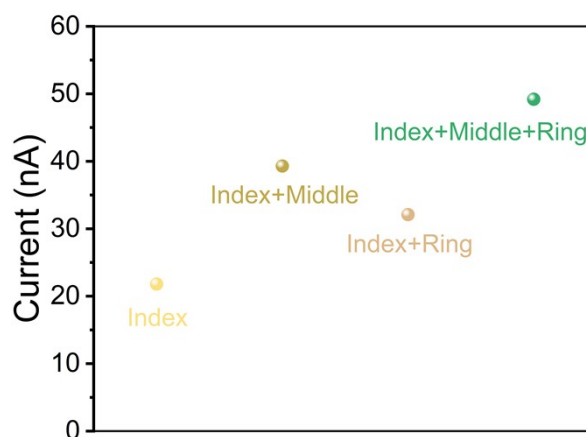

**Figure S25.** Current signal generated by OPD unit during multi-finger bending.



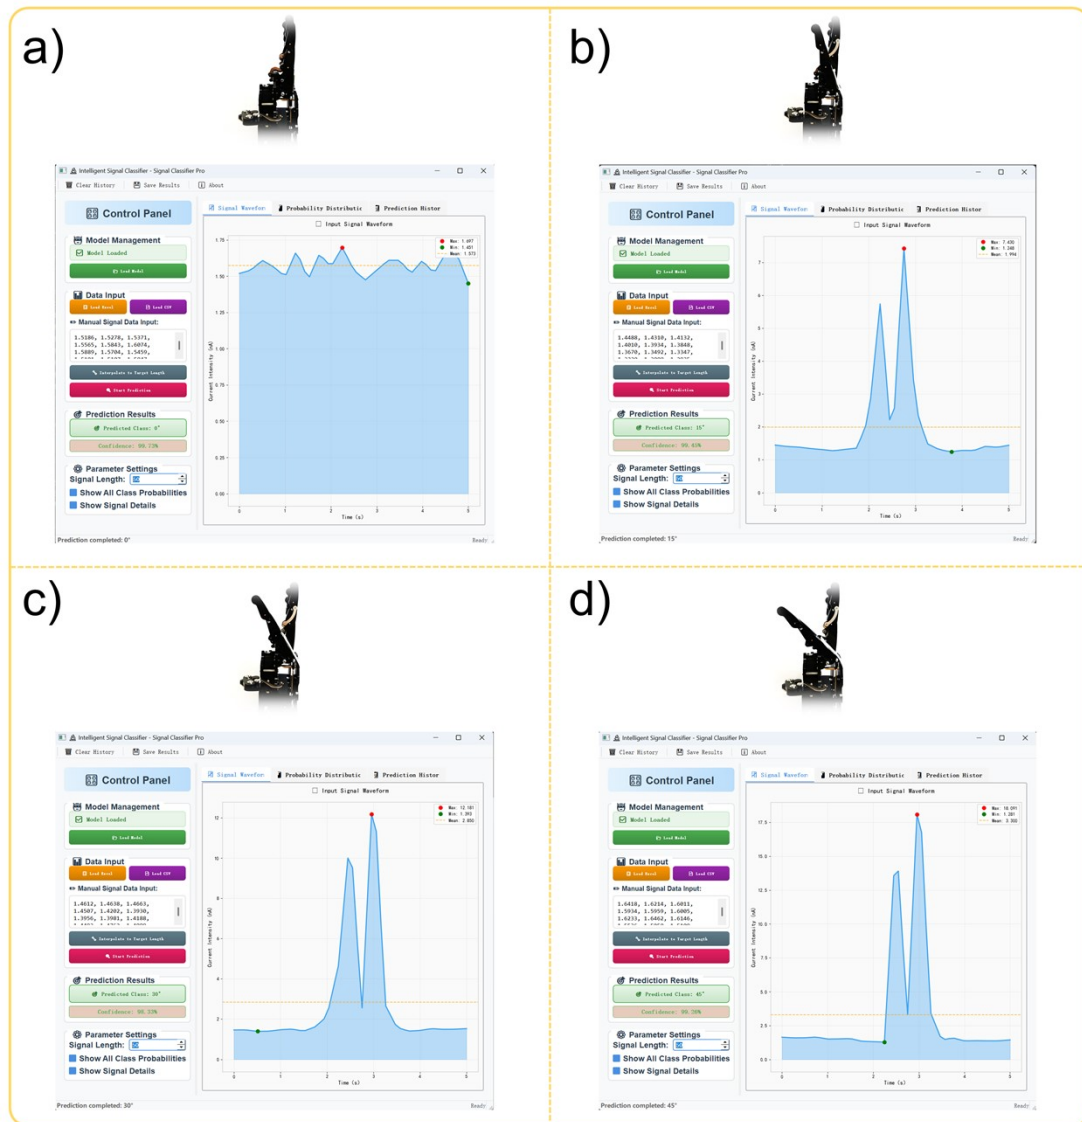

**Figure S26.** GUI interfaces corresponding to motion tracking signals for isolated finger bending. (a) 0°, (b) 15°, (c) 30°, and (d) 45°.

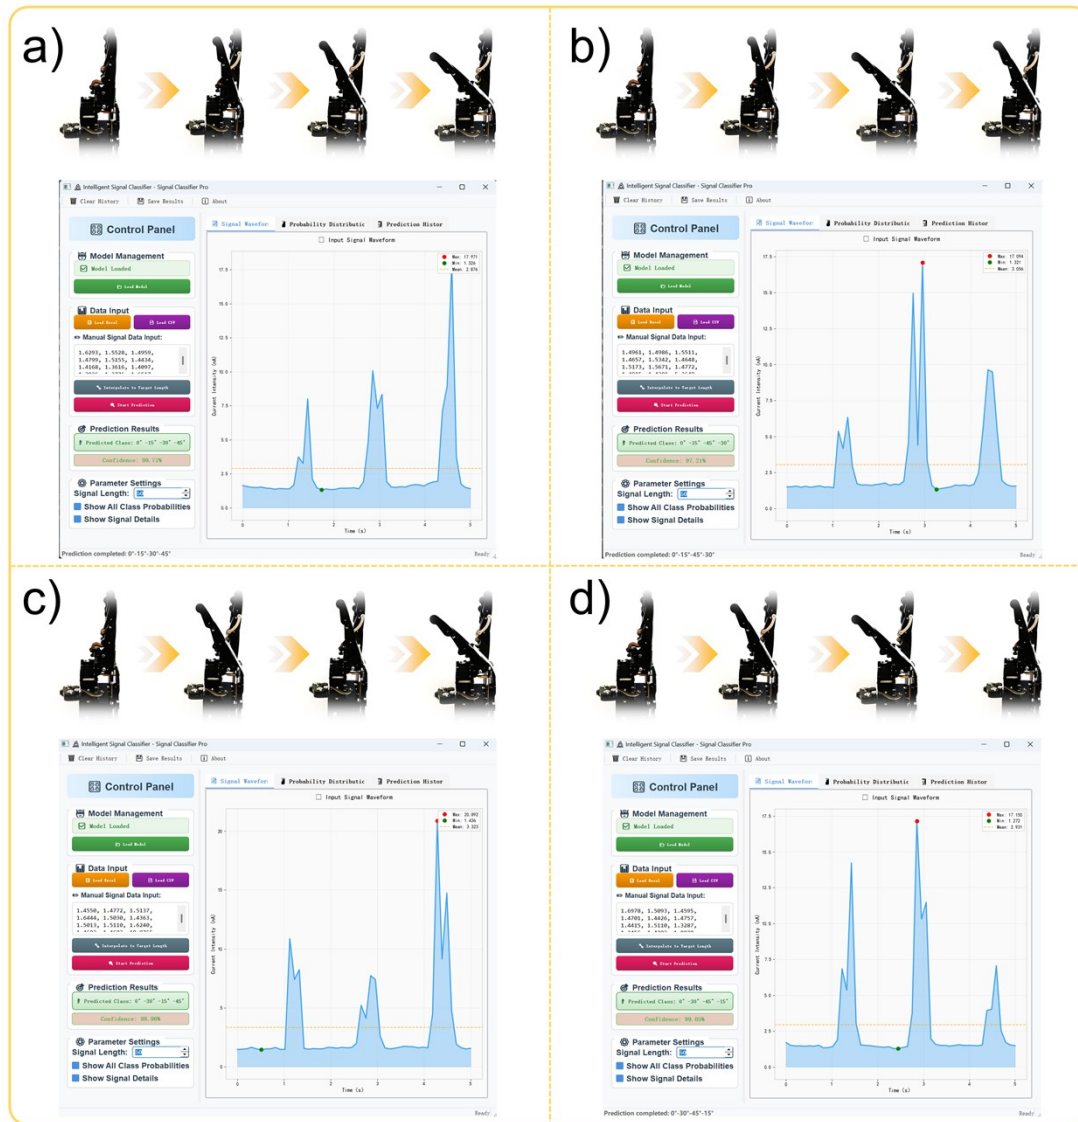

**Figure S27.** GUI interfaces corresponding to motion tracking signals for continuous angel bending. (a) 0°-15-30°-45°, (b) 0°-15-45°-30°, (c) 0°-30-15°-45°, and (d) 0°-30-45°-15°.

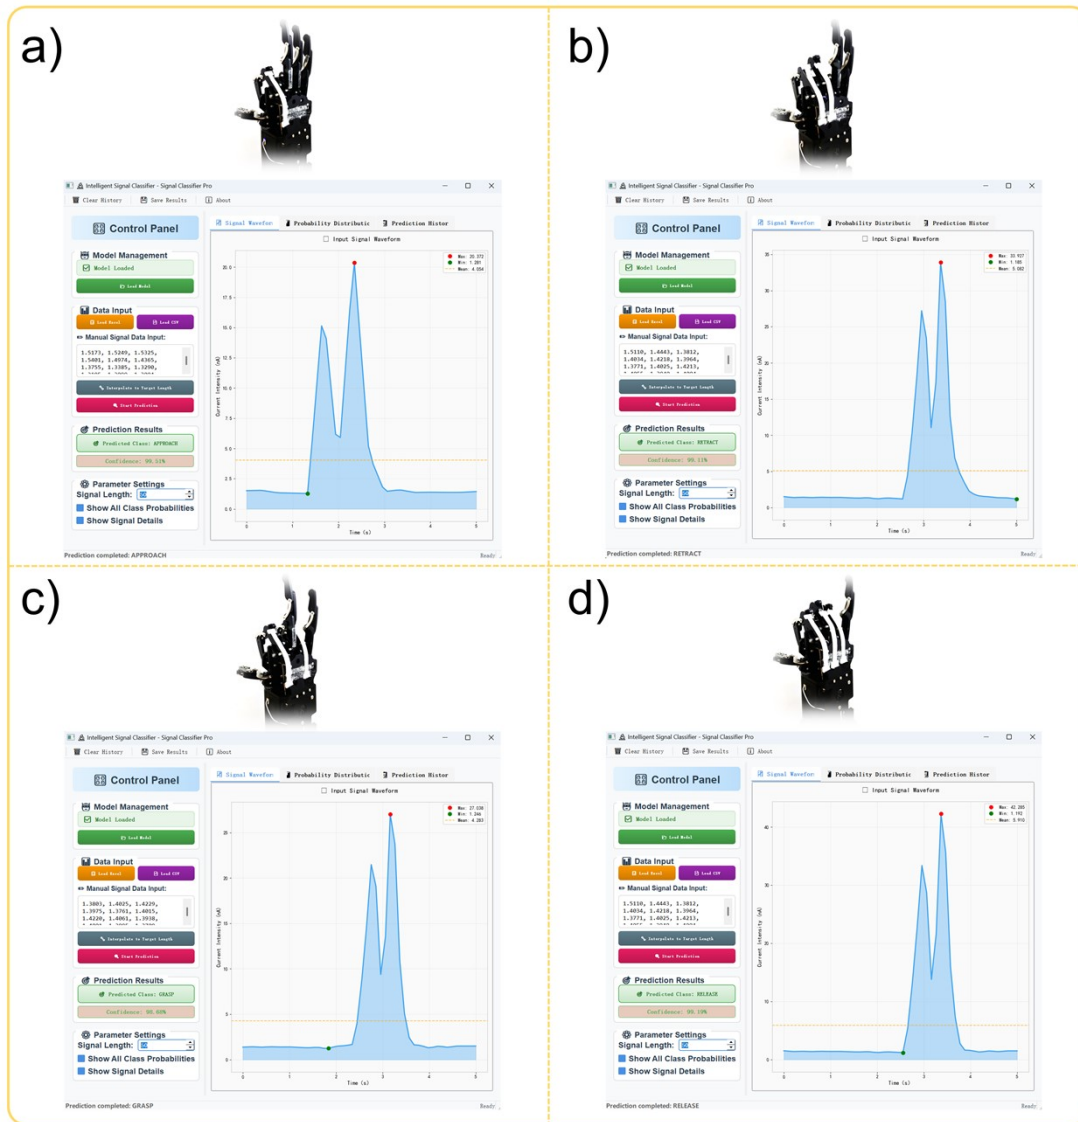

**Figure S28.** GUI interfaces corresponding to gesture recognition signals. (a) APPROACH, (b) RETRACT, (c) GRASP, and (d) RELEASE.

## Reference

1. Y. Wang, M. Yang, B. Yin, B. Wu, G. Liu, S. Jeong, Y. Zhang, C. Yang, Z. He, F. Huang, Y. Cao and C. Duan, *ACS Appl. Mater. Interfaces*, 2024, **16**(49), 66846-66856.
2. X. Zhu, Y. Zhang, H. Li, Y. Zhang, J. Miao, J. Liu and L. Wang, *Sci. Bull.*, 2024, **69**(17), 2679-2682.
3. W. Zhong, X. Wang, W. Wang, Z. Song, Y. Tang, B. Chen, T. Yang and Y. Liang, *Adv. Sci.*, 2024, **12**(3), 2410332.
4. K. H. Huang, B. H. Jiang, H. C. Lu, Y. J. Xue, C. F. Lu, Y. Y. Chang, C. L. Huang, S. Y. Chien, C. P. Chen and Y. J. Cheng, *Adv. Sci.*, 2025, **12**(9), 2413045.
5. W. Liu, W. Guo, L. Fu, Y. Duan, G. Han, J. Gao, H. Liu, Y. Wang, Z. Ma and Y. Liu, *Angew. Chem. Int. Ed.*, 2024, **64**(4), e202416751.
6. Y. Zhang, Y. Yu, X. Liu, J. Miao, Y. Han, J. Liu and L. Wang, *Adv. Mater.*, 2023, **35**(20), 2211714.
7. Y. Lee, S. Biswas, D. H. Nam, J. W. Park, H. Jang, H. Choi, J. Kim, D. W. Park and H. Kim, *Adv. Energy Mater.*, 2025, **15**(16), 2403532.
8. H. Hou, W. Wang, T. Li, Z. Zhang, X. Miao, G. Cai, X. Lu, Y. Yi and Y. Lin, *Angew. Chem. Int. Ed.*, 2025, **64**(16), e202425420.
9. Z. Du, H. M. Luong, S. Sabury, A. L. Jones, Z. Zhu, P. Panoy, S. Chae, A. Yi, H. J. Kim, S. Xiao, V. V. Brus, G. N. Manjunatha Reddy, J. R. Reynolds and T. Q. Nguyen, *Adv. Mater.*, 2023, **36**(9), 2310478.
10. J. Park, M. I. Kim, E. D. Lee, C. Shin, H. Kim, J. Kang, H. Ahn and I. H. Jung, *Small*, 2025, **21**(21), 2410797.
11. W. Jang, H. M. Luong, M. S. Kim, T. Q. Nguyen and D. H. Wang, *Adv. Mater.*, 2024, **36**(48), 2406316.
12. N. Yang, Y. Cui, W. Fu, X. Ma, T. Zhang, W. Wang, Y. Xiao, Z. Chen, Q. Kang, G. Zuo and J. Hou, *ACS Energy Lett.*, 2025, **10**(5), 2468-2476.
13. H. T. Chandran, R. Ma, Z. Xu, J. C. Veetil, Y. Luo, T. A. Dela Peña, I. Gunasekaran, S. Mahadevan, K. Liu, Y. Xiao, H. Xia, J. Wu, M. Li, S. W. Tsang, X. Yu, W. Chen and G. Li, *Adv. Mater.*, 2024, **36**(38), 2407271.

14. Y. Yang, Y. Sun, D. Gao, C. Chen, J. Zhou, J. Cheng, L. Wang, D. Liu, W. Li and T. Wang, *Adv. Funct. Mater.*, 2025, e12335.
15. J. W. Qiao, F. Z. Cui, W. Q. Zhang, R. H. Gui, Z. Fu, M. Sun, P. Lu, H. Yin, X. Y. Du and X. T. Hao, *Adv. Mater.*, 2025, **37**(12), 2418844.
16. Y. Wang, M. Li, R. Wang, H. Shi, F. Li, Y. Zhu, G. Li, W. Ni, Y. Chen, M. Li and Y. Geng, *ACS Appl. Mater. Interfaces*, 2025, **17**, 42162-42173.
17. Y. Xia, J. Zhang, T. Guo, H. Wang, C. Geng, Y. Zhu, R. Han, Y. Yang, G. Song, X. Wan, G. Li and Y. Chen, *Adv. Funct. Mater.*, 2024, **35**(2), 2412813.
18. W. Shi, Q. Han, Y. Zhu, Y. Xia, T. He, S. Wang, L. Li, W. Ma, G. Long, G. Li, Z. Yao, C. Li, X. Wan and Y. Chen, *Natl. Sci. Rev.*, 2025, **12**(1), nwae409.
19. S. Deng, J. Wang, J. Miao, J. Ma, J. Hu and J. Liu, *Adv. Opt. Mater.*, 2025, **13**(14), 2403477.
20. Y. Zhu, H. Chen, R. Han, H. Qin, Z. Yao, H. Liu, Y. Ma, X. Wan, G. Li and Y. Chen, *Natl. Sci. Rev.*, 2024, **11**(3), nwad311.
